# Supplementary material for: Precision medicine and its implementation in patients with NTRK fusion genes: perspective from developing countries
Source: PubMed Central journal article supplement — Ther Adv Respir Dis. 2020 Jul 9;14:1753466620938553. doi: 10.1177/1753466620938553 (PMC7350048; doi:10.1177/1753466620938553), 2020-07-09
Supplement: Reviewer_1_v.1.pdf [file Reviewer_1_v.1.pdf]

Reviewer 1 v.1

Review to: "Precision medicine and its implementation in patients with NTRK fusion genes: perspective from developing countries"

The work gives an overview of the clinical significance of NTRK fusion 1-3 and the importance of IHC-based protein detection compared to NGS.

The title of the paper emphasizes the "perspective of developing countries" with regard to precision medicine, the corresponding diagnostics and therapy. This aspect would be interesting to e.g. build AI-based platforms for molecular tumor boards.

Unfortunately, the focus on the perspective of developing countries described in the title is neglected and the analysis of related problems in developing countries should be examined more specifically.

It would be desirable to have more focus on the diagnostic data of developing countries (in this case NTRK mergers) and available treatment data. Furthermore, the paper should be revised in such a way that a diagnostic workflow is developed for the NTRK mergers, taking into account the applicable ESMO / NCCN guidelines, particularly with regard to the financial situation of the developing countries.
