# Supplementary material for: Precision medicine and its implementation in patients with NTRK fusion genes: perspective from developing countries
Source: PubMed Central journal article supplement — Ther Adv Respir Dis. 2020 Jul 9;14:1753466620938553. doi: 10.1177/1753466620938553 (PMC7350048; doi:10.1177/1753466620938553), 2020-07-09
Supplement: Reviewer_2_v.1.pdf [file Reviewer_2_v.1.pdf]

Reviewer 2 v.1

Comments to the Author

Excellent manuscript focusing on the practice and challenges of precision medicine in developing countries. minor comment / advise might be of value in this setting:

1- Regarding the paragraph: " the importance of precision medicine in countries with limited resources", one opportunity other than the initiation of clinical trials is the compassionate use programs which are of great value for patients in countries with limited resources. This can help patients to get access to innovative therapies, physicians to get hands on experience and to reduce the cost of care for the third parties. Countries such as Lebanon have been benefiting of such programs

2- It is of big importance to add a small note on the ethic considerations for undergoing high standard clinical trials in developing countries: capabilities, training, ground setting. this requires serious commitment and involvement from pharmaceutical companies and cancer centers
